# Supplementary material for: The linkers in fluorene-labeled 2′-deoxyuridines affect fluorescence discriminating phenomena upon duplex formation
Source: Royal Society of Chemistry journal article supplement (doi:10.1039/d0ra01651a), 2020-01-01
Supplement: d0ra01651a1.pdf [file d0ra01651a1.pdf]

Supplementary information for

## The linkers in fluorene-labeled 2'-deoxyuridines affect fluorescence discriminating phenomena upon duplex formation

So Young Lee,<sup>a</sup> Seung Woo Hong,<sup>a</sup> Hyeonuk Yeo\*<sup>b</sup> and Gil Tae Hwang\*<sup>a</sup>

<sup>a</sup> Department of Chemistry and Green-Nano Materials Research Center, Kyungpook National University, Daegu 41566, Republic of Korea

<sup>b</sup> Department of Chemistry Education, Kyungpook National University, Daegu 41566, Republic of Korea

### Contents

|                                                                                                                                                    |     |
|----------------------------------------------------------------------------------------------------------------------------------------------------|-----|
| <b>Fig. S1.</b> (a) Absorption and (b) emission spectra of <b>U<sup>F</sup></b> , <b>U<sup>FL</sup></b> and <b>U<sup>DF</sup></b> in MeOH at 25 °C | S2  |
| <b>Fig. S2.</b> Ground-state optimized molecular structures of (a) <b>U<sup>F</sup></b> , (b) <b>U<sup>FL</sup></b> and (c) <b>U<sup>DF</sup></b>  | S3  |
| <b>Fig. S3.</b> Excited-state optimized molecular structures of (a) <b>U<sup>F</sup></b> , (b) <b>U<sup>FL</sup></b> and (c) <b>U<sup>DF</sup></b> | S3  |
| <b>Table S1.</b> MALDI-TOF mass spectral data of ODNs containing <b>U<sup>F</sup></b> and <b>U<sup>DF</sup></b>                                    | S4  |
| <b>Fig. S4.</b> <sup>1</sup> H NMR spectrum of <b>U<sup>F</sup></b> in CD <sub>3</sub> OD                                                          | S6  |
| <b>Fig. S5.</b> <sup>1</sup> H NMR spectrum of <b>5</b> in CDCl <sub>3</sub>                                                                       | S7  |
| <b>Fig. S6.</b> <sup>1</sup> H NMR spectrum of <b>6</b> in CDCl <sub>3</sub>                                                                       | S8  |
| <b>Fig. S7.</b> <sup>1</sup> H NMR spectrum of <b>U<sup>DF</sup></b> in DMSO- <i>d</i> <sub>6</sub>                                                | S9  |
| <b>Fig. S8.</b> <sup>1</sup> H NMR spectrum of <b>7</b> in CDCl <sub>3</sub>                                                                       | S10 |
| <b>Fig. S9.</b> <sup>1</sup> H NMR spectrum of <b>8</b> in CDCl <sub>3</sub>                                                                       | S11 |
| <b>Fig. S10.</b> <sup>1</sup> H NMR spectrum of <b>9</b> in CDCl <sub>3</sub>                                                                      | S12 |
| <b>Fig. S11.</b> <sup>1</sup> H NMR spectrum of <b>10</b> in DMSO- <i>d</i> <sub>6</sub>                                                           | S13 |

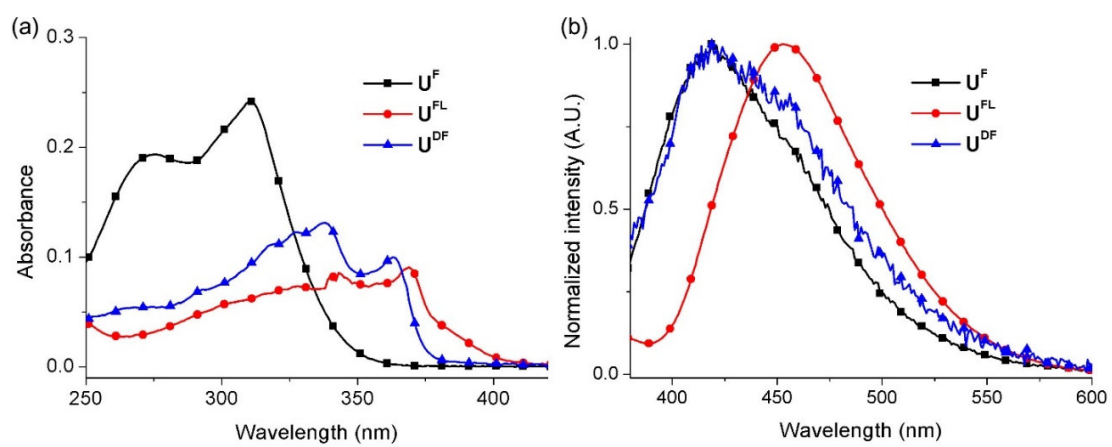

**Fig. S1.** (a) Absorption and (b) emission spectra of  $U^F$ ,  $U^{FL}$  and  $U^{DF}$  in MeOH at 25 °C (each at a concentration of 3  $\mu$ M). Excitation wavelengths: 310 nm for  $U^F$ , 369 nm for  $U^{FL}$  and 363 nm for  $U^{DF}$ .

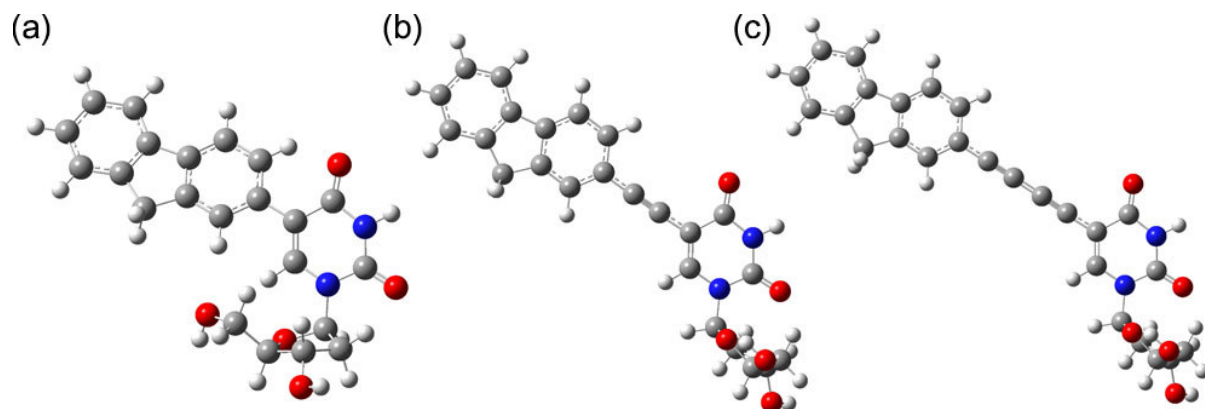

**Fig. S2.** Ground-state optimized geometries of (a)  $U^F$ , (b)  $U^{FL}$  and (c)  $U^{DF}$ , calculated using density functional theory (DFT) at the B3LYP/6-31 level, in vacuo.

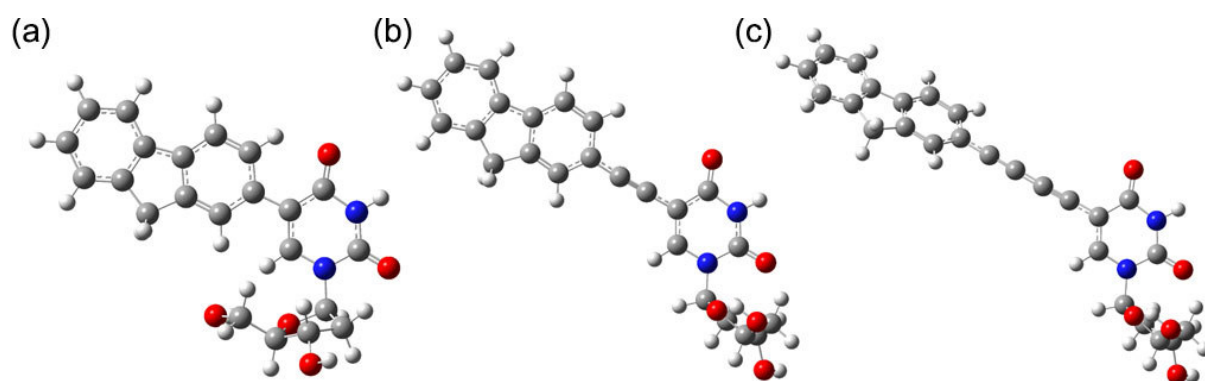

**Fig. S3.** Excited-state optimized geometries of (a)  $U^F$ , (b)  $U^{FL}$  and (c)  $U^{DF}$ , calculated using density functional theory (DFT) at the B3LYP/6-31 level, in vacuo.

**Table S1.** MALDI-TOF mass spectral data of ODNs containing  $U^F$  and  $U^{DF}$

| ODN              | Sequence                             | $m/z$ found (calcd) for $[M + H]^+$ |
|------------------|--------------------------------------|-------------------------------------|
| ODN1( $U^F$ )    | 5'-d(TGG ACT $TU^F$ T TCA ATG)-3'    | 4723.5 (4723)                       |
| ODN1( $U^{DF}$ ) | 5'-d(TGG ACT $TU^{DF}$ T TCA ATG)-3' | 4771.5 (4771)                       |
| ODN2( $U^F$ )    | 5'-d(TGG ACT $CU^F$ C TCA ATG)-3'    | 4693.3 (4693)                       |
| ODN2( $U^{DF}$ ) | 5'-d(TGG ACT $CU^{DF}$ C TCA ATG)-3' | 4740.3 (4741)                       |

ODN1( $U^F$ )

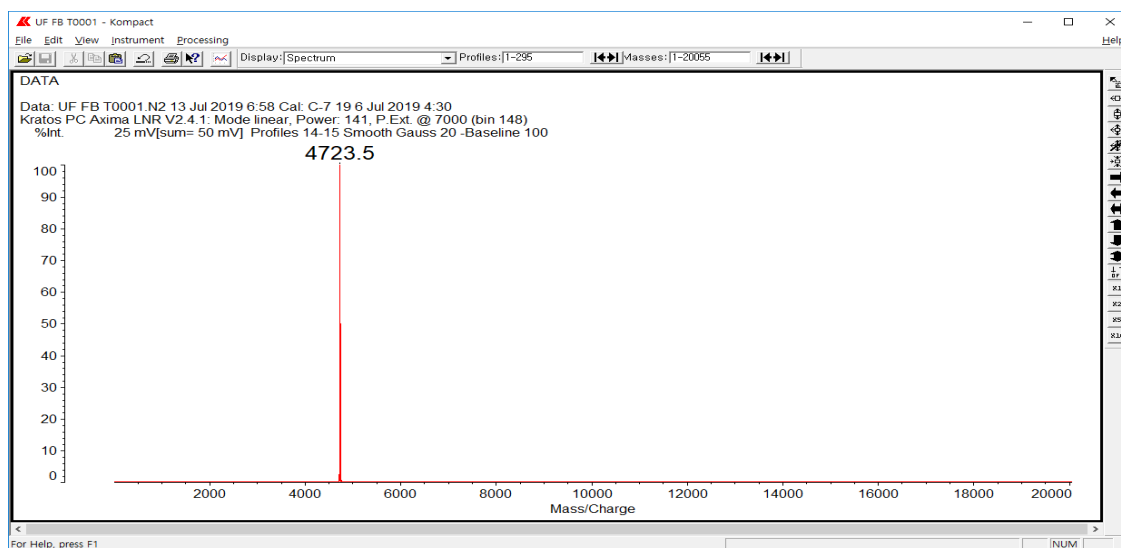

ODN1( $U^{DF}$ )

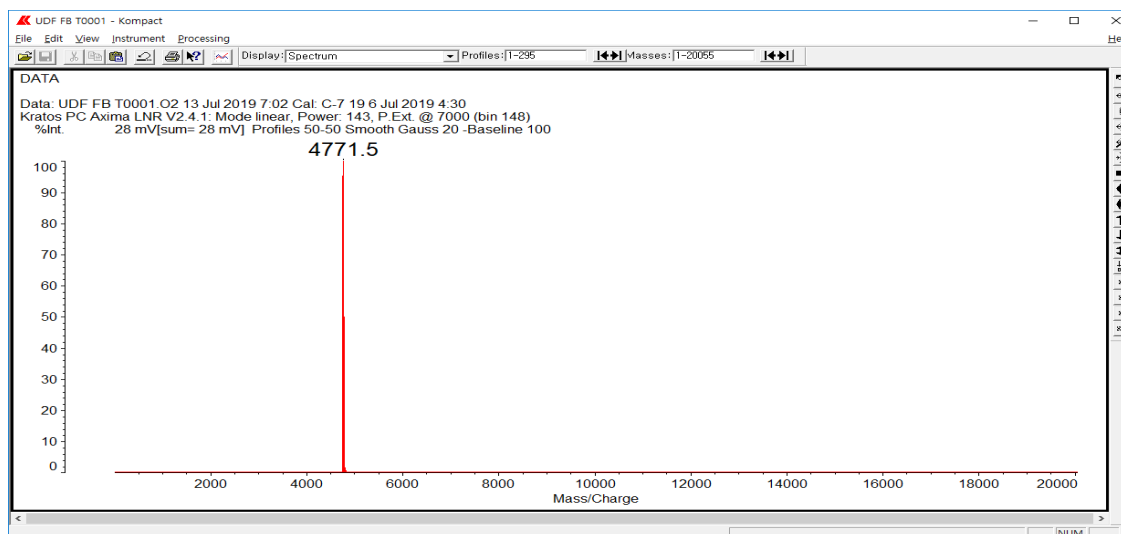

ODN2(U<sup>F</sup>)

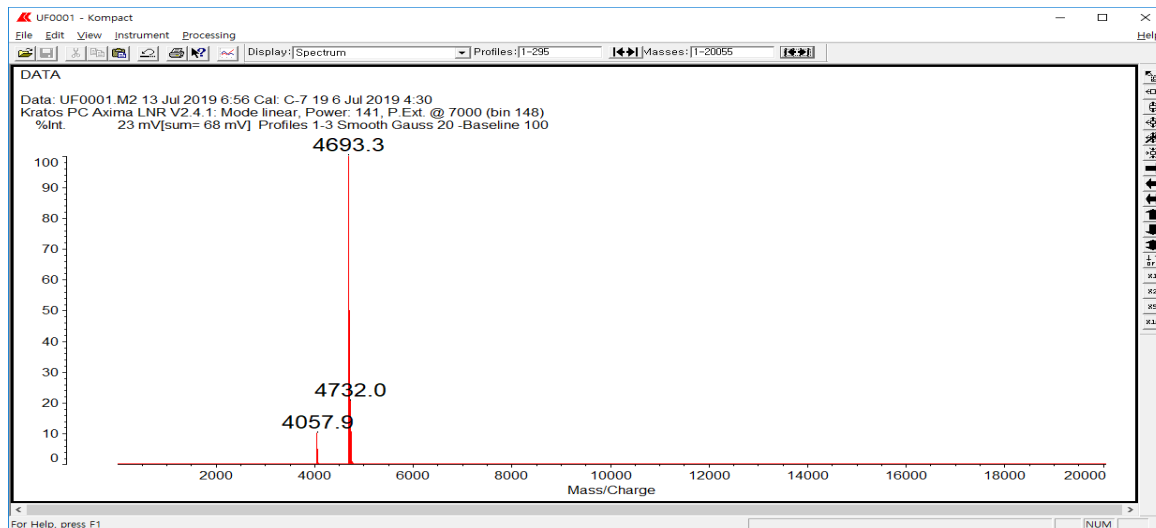

ODN2(U<sup>DF</sup>)

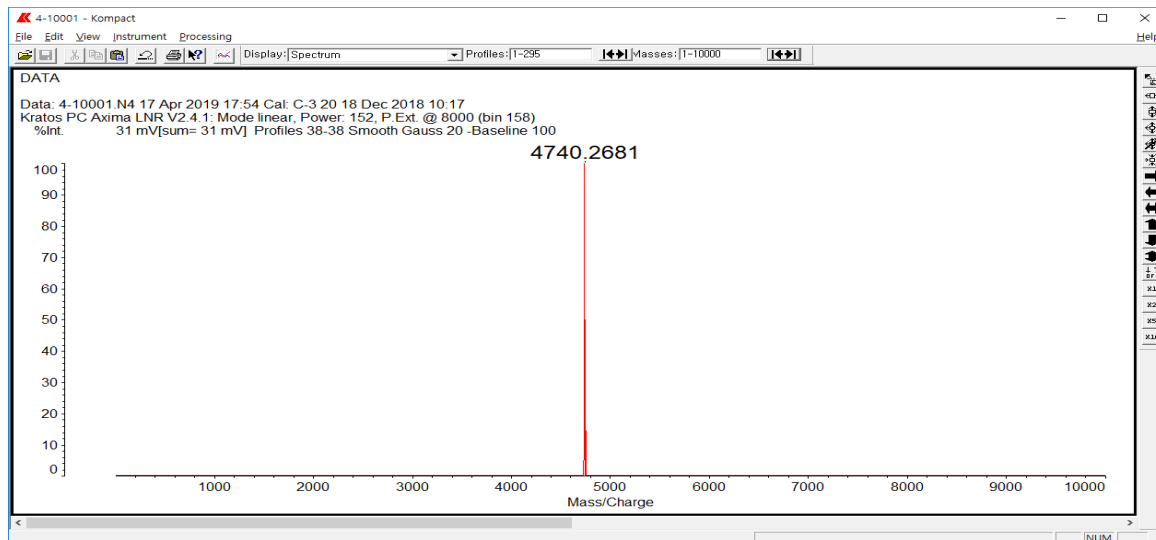

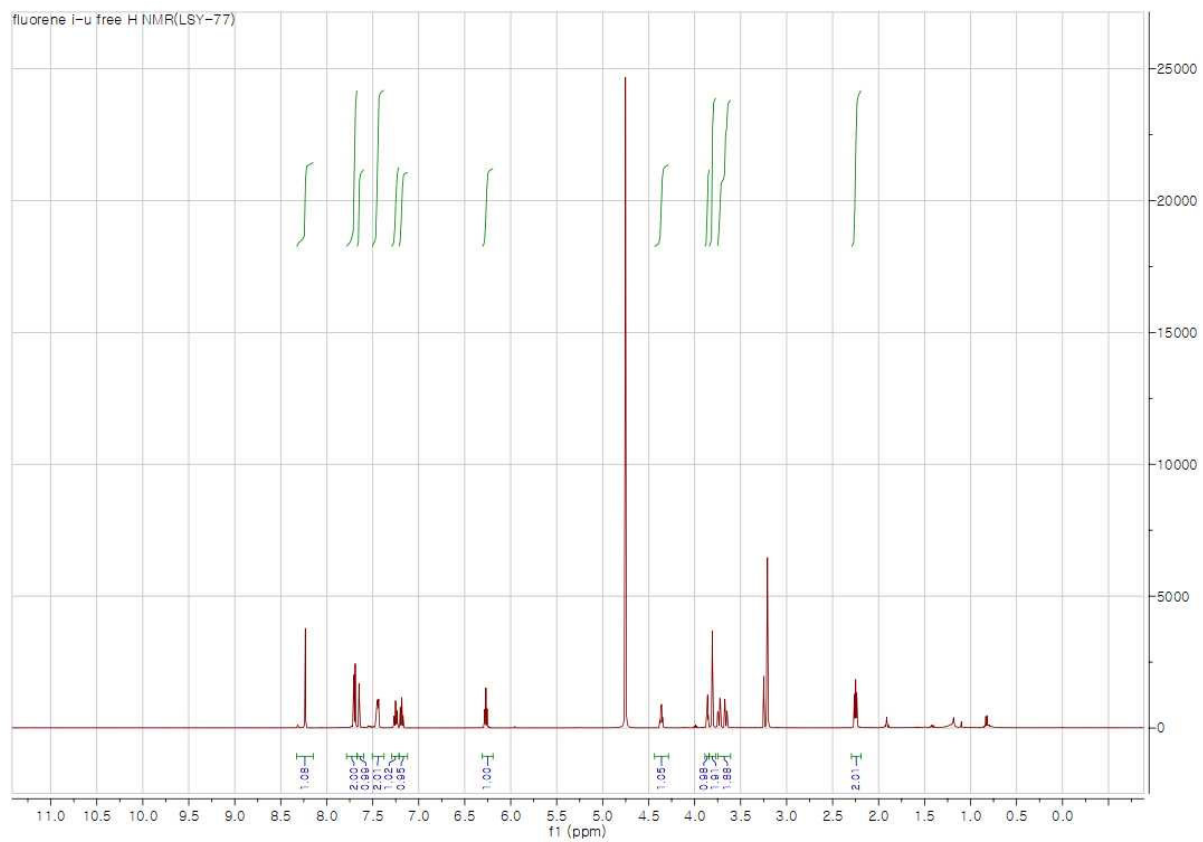

**Fig. S4.**  $^1\text{H}$  NMR spectrum of  $\text{U}^{\text{F}}$  in  $\text{CD}_3\text{OD}$ .

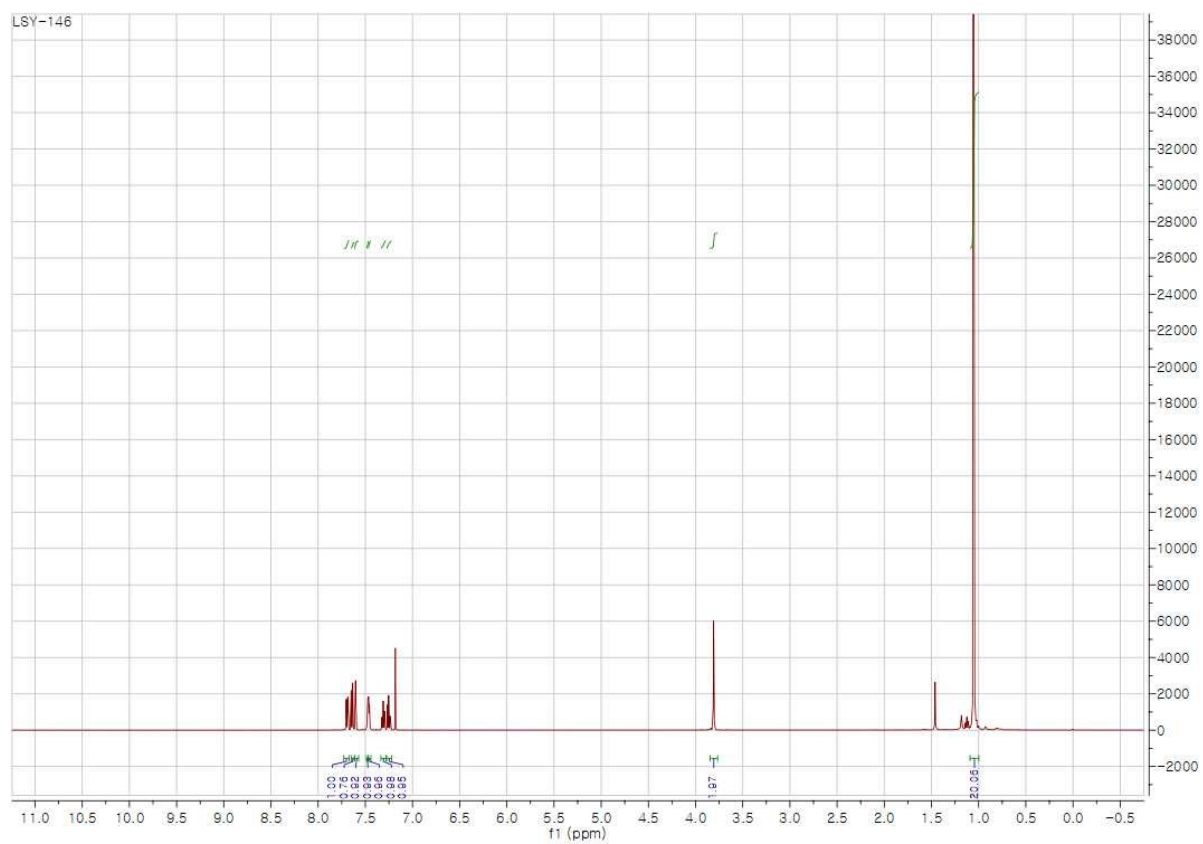

Fig. S5.  $^1\text{H}$  NMR spectrum of **5** in  $\text{CDCl}_3$ .

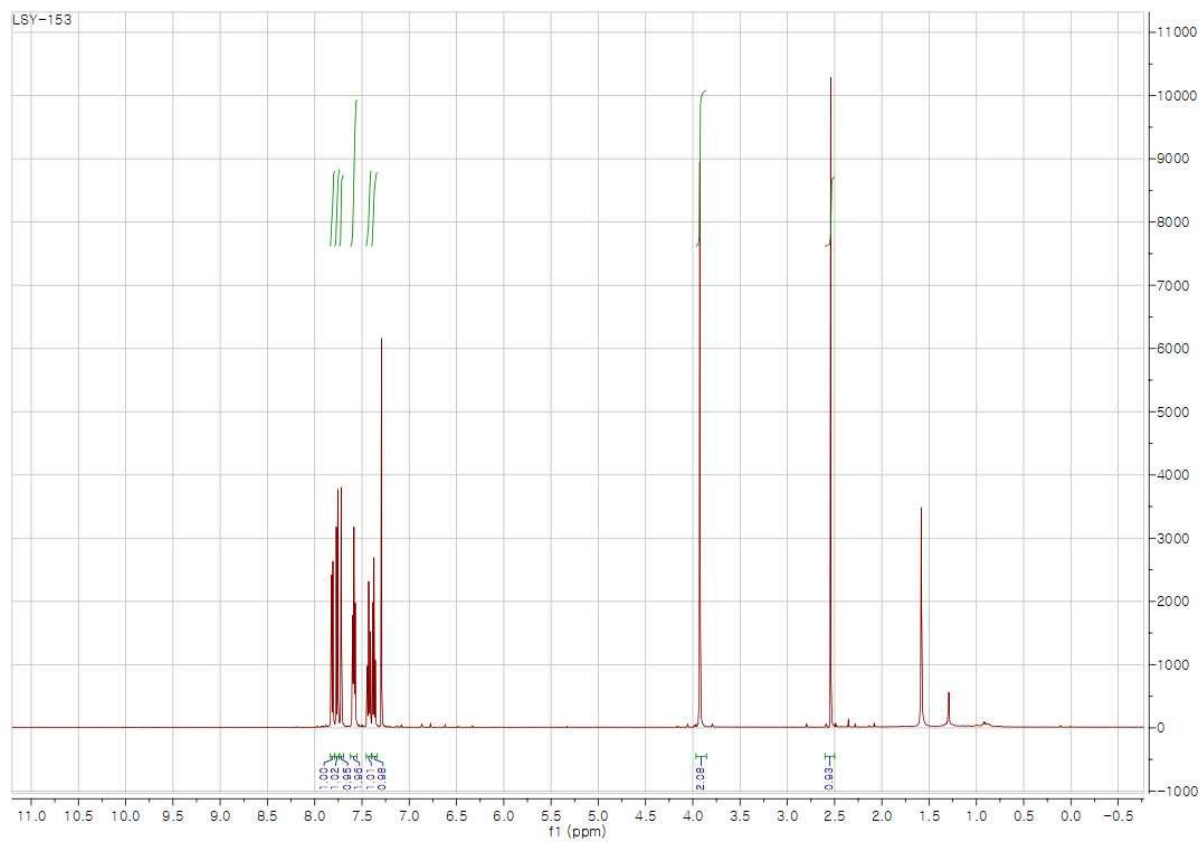

**Fig. S6.**  $^1\text{H}$  NMR spectrum of **6** in  $\text{CDCl}_3$ .



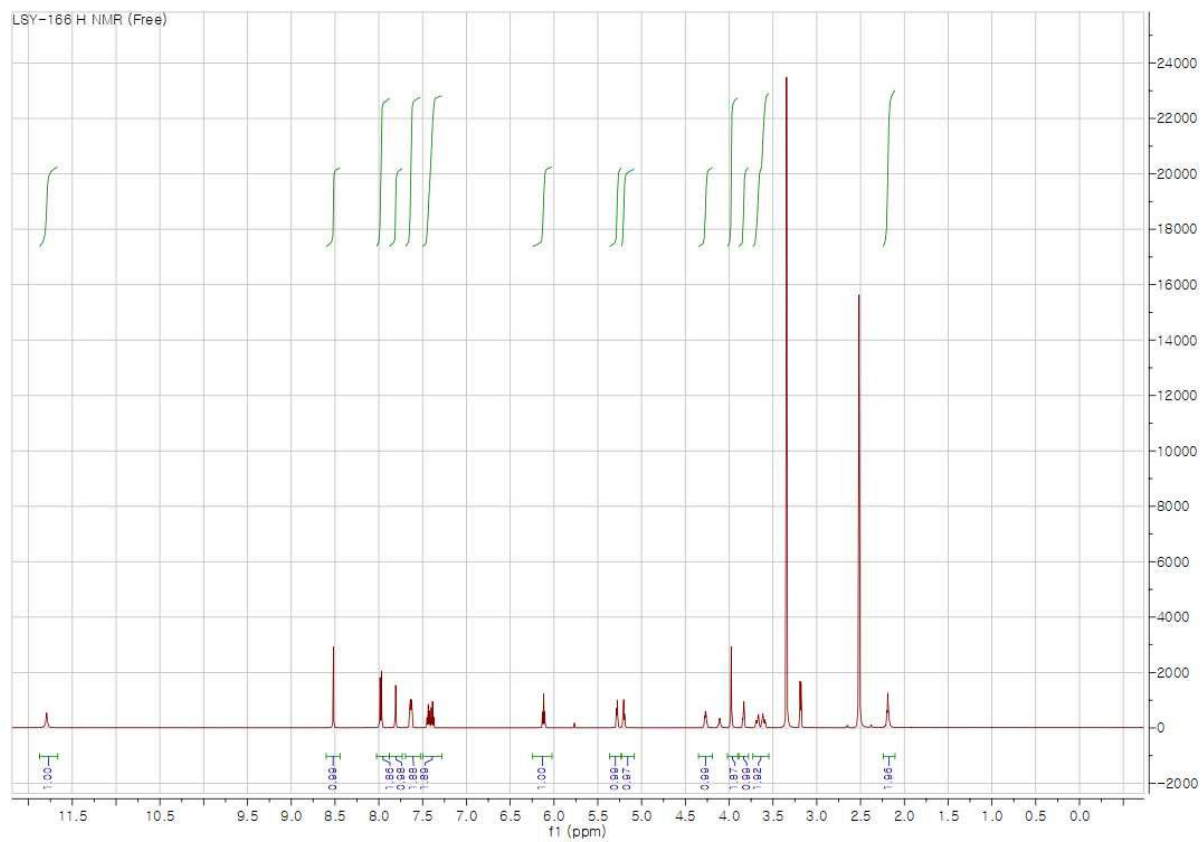

Fig. S7. <sup>1</sup>H NMR spectrum of U<sup>DF</sup> in DMSO-d<sub>6</sub>.

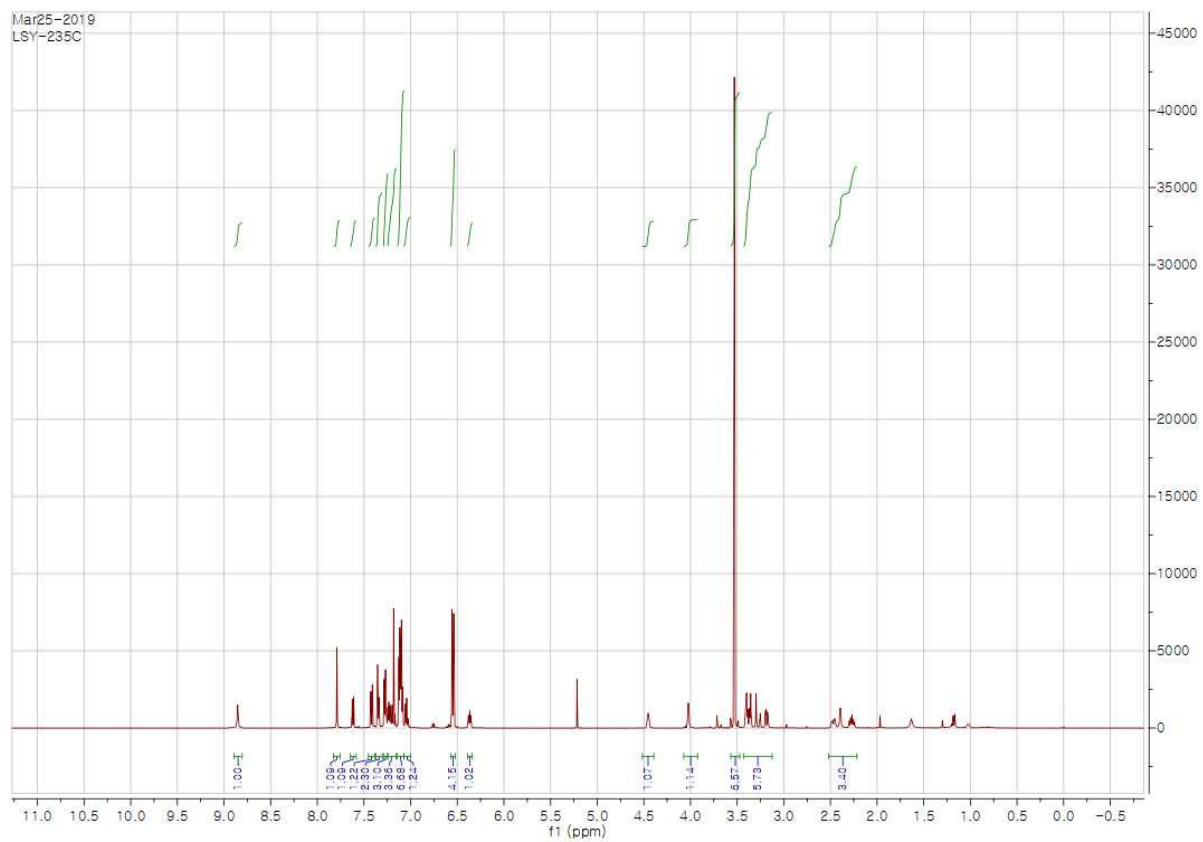

**Fig. S8.**  $^1\text{H}$  NMR spectrum of **7** in  $\text{CDCl}_3$ .

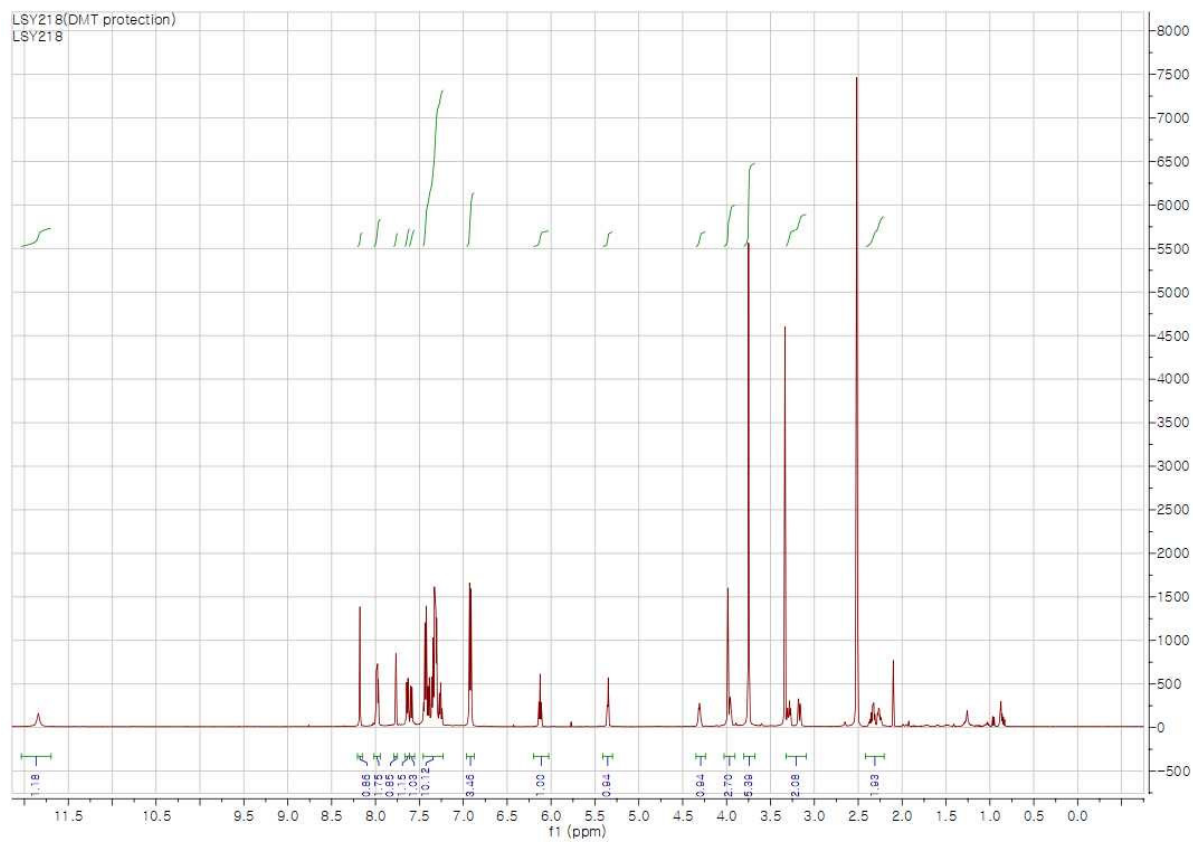

**Fig. S9.**  $^1\text{H}$  NMR spectrum of **8** in  $\text{CDCl}_3$ .

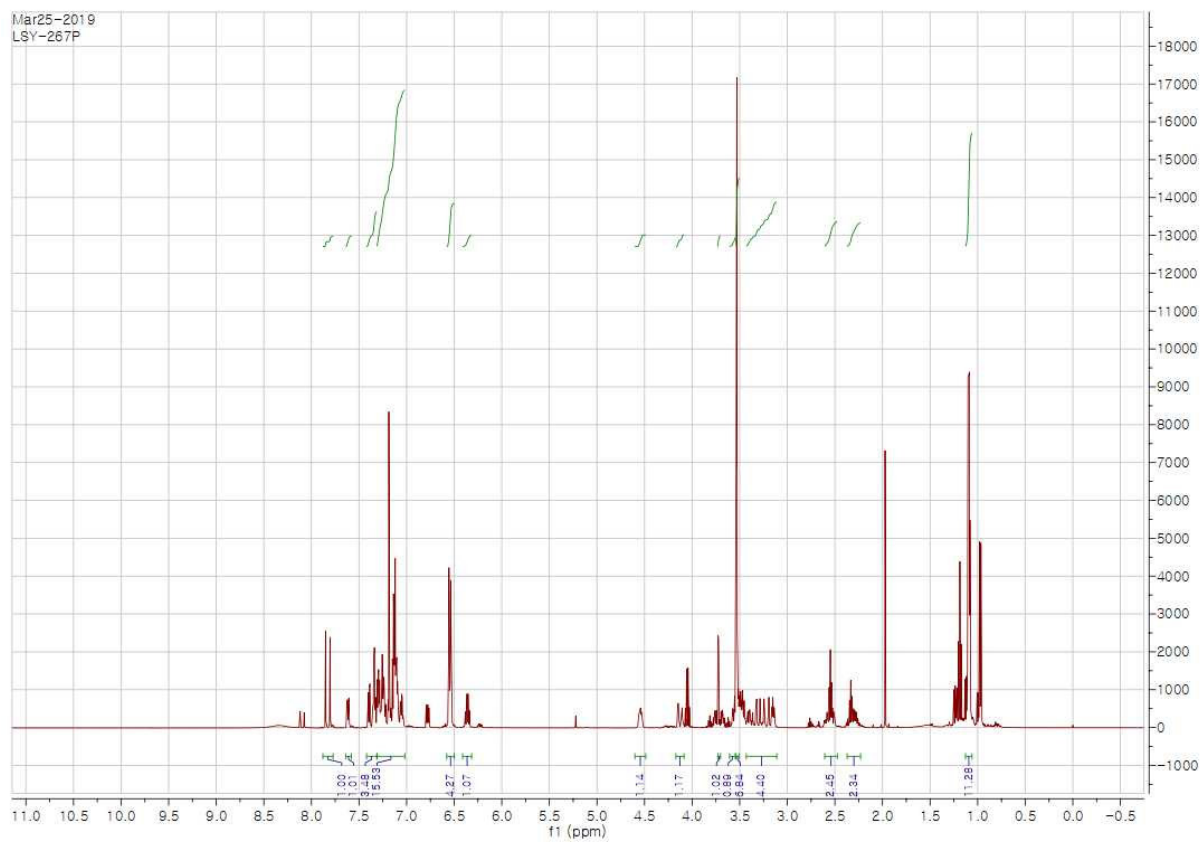

**Fig. S10.**  $^1\text{H}$  NMR spectrum of **9** in  $\text{CDCl}_3$ .

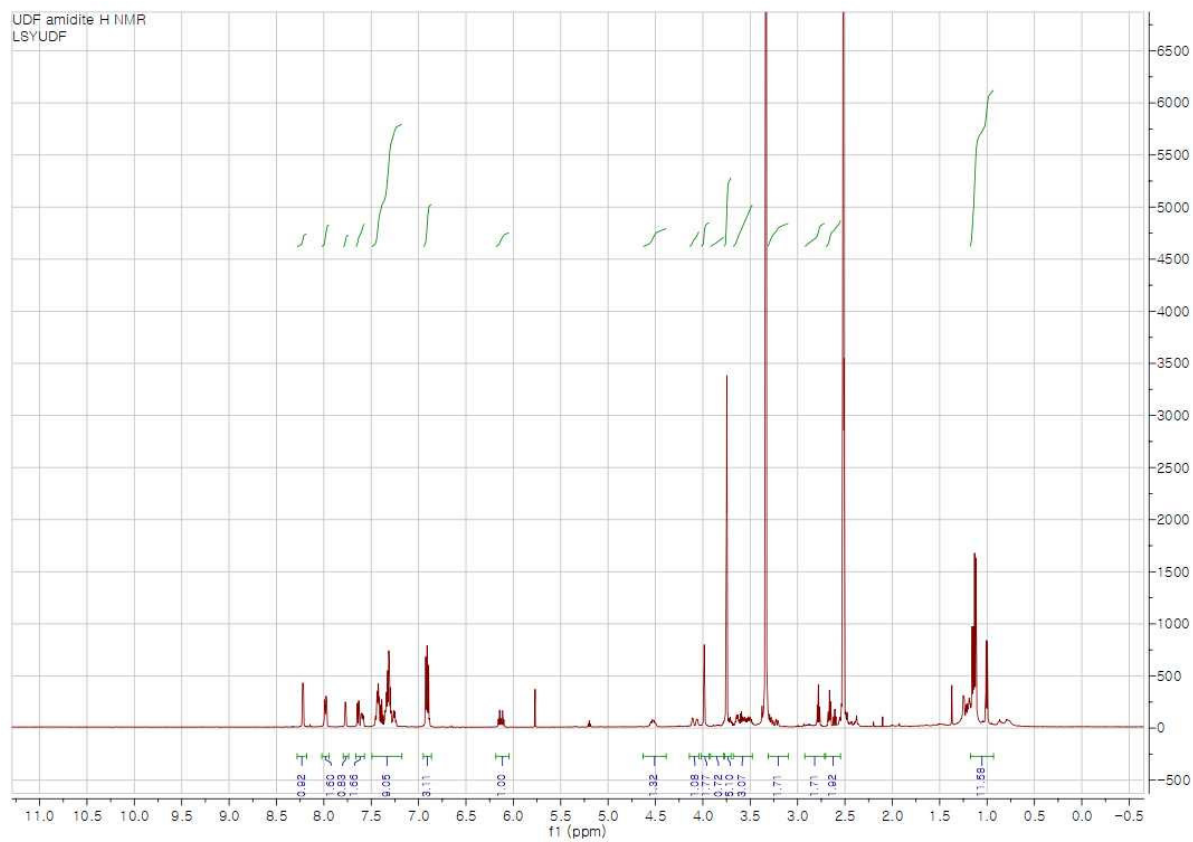

**Fig. S11.**  $^1\text{H}$  NMR spectrum of **10** in  $\text{DMSO-}d_6$ .
